# Supplementary material for: Testing for physical validity in molecular simulations
Source: PubMed Central journal article supplement (PMC6126824; doi:10.1371/journal.pone.0202764), 2018-09-06
Supplement: pone.0202764.s002.pdf [file pone.0202764.s002.pdf]

## S2 Separation of molecular degrees of freedom

The total kinetic energy of a molecular system of particles is given by

$$K_{\text{tot}} = \frac{1}{2} \sum_i m_i \mathbf{v}_i^2, \quad (1)$$

where the sum runs over all atoms  $i$  in the system, mass  $m_i$  and  $\mathbf{v}_i$  being the mass and velocity vector of atom  $i$ , respectively. The component of the kinetic energy associated with the center-of-mass motion translation of the molecules is calculated as

$$K_{\text{tra}} = \frac{1}{2} \sum_J M_J \mathbf{v}_J^2, \quad \text{with } \mathbf{v}_J = \frac{1}{M_J} \sum_{i \in J} m_i \mathbf{v}_i, \quad (2)$$

where the sum runs over all molecules  $J$  in the system,  $M_J$  and  $\mathbf{v}_J$  being the total mass and translational center-of-mass velocity vector, respectively. The rotational and internal kinetic energy is then simply the remainder,

$$K_{\text{r+i}} = K_{\text{tot}} - K_{\text{tra}}, \quad (3)$$

or

$$K_{\text{r+i}} = \frac{1}{2} \sum_i m_i \mathbf{v}_{\text{r+i},i}^2, \quad \text{with } \mathbf{v}_{\text{r+i},i} = \mathbf{v}_i - \mathbf{v}_{J(i)}. \quad (4)$$

This kinetic energy can be further separated into rotational and internal components [1]. The rotational part represents the rotational kinetic energy of a hypothetical rigid body having the shape of the molecule in the current configuration, whereas the internal part contains any deviation from the rigid-body behavior. The instantaneous tensor of inertia of molecule  $J$  is defined by its components as

$$\begin{aligned} I_{J,\alpha\alpha} &= \sum_{i \in J} m_i (\mathbf{r}_{\text{r+i},i}^2 - \alpha_{\text{r+i},i}^2) \\ I_{J,\alpha\beta} &= - \sum_{i \in J} m_i \alpha_{\text{r+i},i} \beta_{\text{r+i},i}, \end{aligned} \quad (5)$$

where  $\alpha, \beta \in \{x, y, z\}$  with  $\alpha \neq \beta$ , the components of  $\mathbf{r}$  are  $\{x, y, z\}$ , and  $\mathbf{r}_{\text{r+i},i}$  is the position of atom  $i$  relative to the center of mass of the molecule  $J$  it belongs to. The angular momentum  $\mathbf{L}_J$  vector of molecule  $J$  is given by

$$\mathbf{L}_J = \sum_{i \in J} m_i \mathbf{r}_{\text{r+i},i} \times \mathbf{v}_{\text{r+i},i}, \quad (6)$$

and is related to the angular velocity vector  $\boldsymbol{\omega}_J$

$$\mathbf{L}_J = \mathbf{I}_J \boldsymbol{\omega}_J. \quad (7)$$

The rotational kinetic energy is then given by

$$K_{\text{rot}} = \frac{1}{2} \sum_J \boldsymbol{\omega}_J^T \mathbf{L}_J = \frac{1}{2} \sum_J \boldsymbol{\omega}_J^T \mathbf{I}_J \boldsymbol{\omega}_J. \quad (8)$$

The internal kinetic energy is then simply given by the difference between the rotational and internal kinetic energy (Eq. 4) and its purely rotational component (Eq. 8), namely

$$K_{\text{int}} = K_{\text{r+i}} - K_{\text{rot}}. \quad (9)$$

## References

1. Jellinek J, Li DH. Separation of the Energy of Overall Rotation in Any  $N$ -Body System. Physical Review Letters. 1989;62(3):241–244. doi:10.1103/PhysRevLett.62.241.
