# Supplementary material for: Testing for physical validity in molecular simulations
Source: PubMed Central journal article supplement (PMC6126824; doi:10.1371/journal.pone.0202764), 2018-09-06
Supplement: pone.0202764.s003.pdf [file pone.0202764.s003.pdf]

### S3 Additional results

| $\Delta t$<br>[fs] | simple                                          |                                                  | shift                                           |                                                  | switch                                          |                                                  |
|--------------------|-------------------------------------------------|--------------------------------------------------|-------------------------------------------------|--------------------------------------------------|-------------------------------------------------|--------------------------------------------------|
|                    | $\delta E(\Delta t)$<br>[kJ mol <sup>-1</sup> ] | $\frac{\delta E(2\Delta t)}{\delta E(\Delta t)}$ | $\delta E(\Delta t)$<br>[kJ mol <sup>-1</sup> ] | $\frac{\delta E(2\Delta t)}{\delta E(\Delta t)}$ | $\delta E(\Delta t)$<br>[kJ mol <sup>-1</sup> ] | $\frac{\delta E(2\Delta t)}{\delta E(\Delta t)}$ |
| 4                  | $7.08 \times 10^{-1}$                           | –                                                | $1.03 \times 10^{-2}$                           | –                                                | $9.90 \times 10^{-3}$                           | –                                                |
| 2                  | $7.12 \times 10^{-1}$                           | 1.00                                             | $2.68 \times 10^{-3}$                           | 3.86                                             | $2.51 \times 10^{-3}$                           | 3.94                                             |
| 1                  | $7.07 \times 10^{-1}$                           | 1.01                                             | $6.09 \times 10^{-4}$                           | 4.40                                             | $6.28 \times 10^{-4}$                           | 4.00                                             |
| 1/2                | $7.02 \times 10^{-1}$                           | 1.01                                             | $1.73 \times 10^{-4}$                           | 3.53                                             | $1.57 \times 10^{-4}$                           | 4.01                                             |
| 1/4                | $7.02 \times 10^{-1}$                           | 1.00                                             | $5.56 \times 10^{-5}$                           | 3.10                                             | $3.91 \times 10^{-5}$                           | 4.01                                             |
| 1/8                | $7.04 \times 10^{-1}$                           | 1.00                                             | $2.96 \times 10^{-5}$                           | 1.88                                             | $9.76 \times 10^{-6}$                           | 4.01                                             |

**Table A. Results of the integrator convergence test.** Only the system using a cutoff with switched forces passes the integrator test. The data is illustrated graphically in Fig. 2. This table lists numerical results of the integrator convergence test for three different choices of cutoff schemes. For each of the three schemes “simple”, “shifted” and “switch” at all tested timestep sizes, the table lists fluctuations of the total energy ( $\delta E$ ), and the ratio of the fluctuations at the next-larger timestep and the current timestep ( $\frac{\delta E(2\Delta t)}{\delta E(\Delta t)}$ ). It can be observed that for the “simple” scheme, the fluctuation ratio is found to be around 1 in all cases, indicating no dependence of the fluctuations on the chosen timestep. For the “shift” scheme, a dependence on the timestep can be observed, which is around the expected value of 4 for the higher timesteps, but decreases as the lowest tested timesteps are reached. The “switch” scheme, on the other hand, exhibits the expected dependence on the timestep even at the smallest timestep tested.

| $\Delta t$ [fs] | Slope of total energy [kJ mol <sup>-1</sup> / ns] |                        |                        |
|-----------------|---------------------------------------------------|------------------------|------------------------|
|                 | <b>simple</b>                                     | <b>shift</b>           | <b>switch</b>          |
| 4               | $8.56 \times 10^{-4}$                             | $1.16 \times 10^{-4}$  | $9.64 \times 10^{-6}$  |
| 2               | $-1.55 \times 10^{-3}$                            | $4.95 \times 10^{-5}$  | $-2.85 \times 10^{-7}$ |
| 1               | $2.29 \times 10^{-3}$                             | $9.73 \times 10^{-5}$  | $-8.23 \times 10^{-7}$ |
| 1/2             | $-5.06 \times 10^{-4}$                            | $-1.85 \times 10^{-5}$ | $-1.27 \times 10^{-7}$ |
| 1/4             | $1.73 \times 10^{-3}$                             | $8.11 \times 10^{-6}$  | $-3.90 \times 10^{-7}$ |
| 1/8             | $-2.13 \times 10^{-4}$                            | $-7.92 \times 10^{-8}$ | $-4.54 \times 10^{-8}$ |

**Table B. Energy drift of the constant energy simulations.** This table lists the energy drift of the constant energy simulations for the three different cutoff schemes “simple”, “shifted” and “switch” at all tested timestep sizes. The drift is calculated by performing a least-squares fit of the total energy trajectory over 1 ns to a straight line. The drift is in all cases significantly smaller than the RMSD reported in Tab. A.

|              |  | NVT               |                   |                   |                   |
|--------------|--|-------------------|-------------------|-------------------|-------------------|
|              |  | 300 K             |                   | 308 K             |                   |
|              |  | $T_\mu$           | $T_\sigma$        | $T_\mu$           | $T_\sigma$        |
| <b>WC</b>    |  | $300.00 \pm 0.03$ | $222.66 \pm 1.10$ | $307.99 \pm 0.03$ | $229.10 \pm 1.19$ |
| <b>VR/PR</b> |  | $299.95 \pm 0.04$ | $300.71 \pm 1.52$ | $308.05 \pm 0.05$ | $309.12 \pm 1.77$ |

  

|           |  | NPT               |                   |                   |                   |                   |                   |                   |                   |
|-----------|--|-------------------|-------------------|-------------------|-------------------|-------------------|-------------------|-------------------|-------------------|
|           |  | 300 K, 1 bar      |                   | 308 K, 1 bar      |                   | 300 K, 301 bar    |                   | 308 K, 301 bar    |                   |
|           |  | $T_\mu$           | $T_\sigma$        | $T_\mu$           | $T_\sigma$        | $T_\mu$           | $T_\sigma$        | $T_\mu$           | $T_\sigma$        |
| <b>WC</b> |  | $299.95 \pm 0.03$ | $220.45 \pm 1.12$ | $307.97 \pm 0.03$ | $227.82 \pm 1.24$ | $299.93 \pm 0.03$ | $222.01 \pm 1.18$ | $307.94 \pm 0.03$ | $226.48 \pm 1.29$ |
| <b>VR</b> |  | $300.04 \pm 0.05$ | $301.64 \pm 1.75$ | $307.99 \pm 0.05$ | $306.59 \pm 1.64$ | $300.01 \pm 0.05$ | $298.22 \pm 1.58$ | $307.97 \pm 0.05$ | $309.96 \pm 1.78$ |

**Table C. Results of the non-strict kinetic energy test.** The coupling algorithms sample significantly different kinetic energy distributions. The data is illustrated graphically in Fig. 3. All results are from a water system of 900 TIP3P molecules. The temperature was controlled using either the weak-coupling (WC) or the velocity-rescale (VR) algorithm, complemented in the NPT case by a weak-coupling and a Parrinello-Rahman (PR) pressure-control algorithm, respectively. This table lists the empirical temperatures for the mean and the variance, as defined by Eq. 12. It becomes obvious that the mean of both the WC and the VR distributions is correct, but that WC samples a distribution which is significantly narrower than expected.

|              | NVT            |            | NPT ( <i>1d</i> ) |            |                   |            | NPT ( <i>2d</i> ) |            |                  |            |
|--------------|----------------|------------|-------------------|------------|-------------------|------------|-------------------|------------|------------------|------------|
|              | $\Delta T$ [K] | $\#\sigma$ | $\Delta T$ [K]    | $\#\sigma$ | $\Delta P$ [bar]  | $\#\sigma$ | $\Delta T$ [K]    | $\#\sigma$ | $\Delta P$ [bar] | $\#\sigma$ |
| <b>ANA</b>   | 8.0            |            | 8.0               |            | 300.0             |            | 8.0               |            | 296.1            |            |
| <b>WC</b>    | $14.0 \pm 0.2$ | 34.6       | $16.6 \pm 0.3$    | 33.4       | $1232.7 \pm 46.0$ | 20.3       | $12.3 \pm 0.4$    | 11.4       | $851.5 \pm 25.3$ | 22.0       |
| <b>VR/PR</b> | $8.1 \pm 0.1$  | 0.7        | $7.9 \pm 0.1$     | 0.7        | $292.7 \pm 3.5$   | 2.1        | $7.8 \pm 0.1$     | 1.5        | $288.7 \pm 4.4$  | 1.7        |

**Table D. Results of the ensemble test.** The coupling algorithms sample significantly different potential energy distributions. The data is illustrated graphically in Fig. 3. All results are from a water system of 900 TIP3P molecules. The temperature was controlled using either the weak-coupling (WC) or the velocity-rescale (VR) algorithm, complemented in the NPT case by a weak-coupling and a Parrinello-Rahman (PR) pressure-control algorithm, respectively. This table lists interval estimates at different state points as described in the theory section of the main text. The row ANA lists the expected (analytical) intervals. The rows WC and VR/PR list the interval estimates obtained by comparing the simulations at different temperatures under NVT and NPT ( $\Delta T$ , one-dimensional temperature fit), the simulations at different pressures under NPT ( $\Delta P$ , one-dimensional pressure fit), and simulations differing in both temperature and pressure under NPT ( $\Delta T$  and  $\Delta P$  simultaneously, two-dimensional fit). Each simulation estimate is followed by the number of standard deviations ( $\#\sigma$ ) the estimate deviates from the true value.

(a) Heat of vaporization estimates

| Comp. | $\Delta H_{\text{vap}}$ [kJ mol <sup>-1</sup> ] |            |            |
|-------|-------------------------------------------------|------------|------------|
|       | WC                                              | VR         | SD         |
| MTL   | 42.5 ± 0.4                                      | 43.3 ± 0.4 | 42.7 ± 0.4 |
| ETL   | 45.6 ± 0.5                                      | 46.7 ± 0.5 | 46.1 ± 0.5 |
| 1PL   | 49.6 ± 0.6                                      | 51.5 ± 0.5 | 50.8 ± 0.5 |
| BTL   | 54.0 ± 0.7                                      | 56.6 ± 0.6 | 55.9 ± 0.6 |
| PTL   | 58.8 ± 0.7                                      | 61.7 ± 0.7 | 61.1 ± 0.7 |
| HXL   | 64.1 ± 0.8                                      | 67.1 ± 0.7 | 66.3 ± 0.7 |
| HPL   | 69.1 ± 0.9                                      | 72.3 ± 0.8 | 71.5 ± 0.8 |
| OTL   | 74.3 ± 1.0                                      | 77.4 ± 0.9 | 76.6 ± 0.8 |

(b) Average of total, translational, rotational and internal temperature (all values in [K])

| Comp. | GAS WC           |                  |                  |                  | GAS VR           |                  |                  |                  | GAS SD           |                  |                  |                  | LIQ VR           |                  |                  |                  |
|-------|------------------|------------------|------------------|------------------|------------------|------------------|------------------|------------------|------------------|------------------|------------------|------------------|------------------|------------------|------------------|------------------|
|       | $T_{\text{tot}}$ | $T_{\text{tra}}$ | $T_{\text{rot}}$ | $T_{\text{int}}$ | $T_{\text{tot}}$ | $T_{\text{tra}}$ | $T_{\text{rot}}$ | $T_{\text{int}}$ | $T_{\text{tot}}$ | $T_{\text{tra}}$ | $T_{\text{rot}}$ | $T_{\text{int}}$ | $T_{\text{tot}}$ | $T_{\text{tra}}$ | $T_{\text{rot}}$ | $T_{\text{int}}$ |
| MTL   | 298              | 269              | 336              | 273              | 298              | 240              | 303              | 459              | 298              | 298              | 294              | 309              | 298              | 297              | 294              | 313              |
| ETL   | 298              | 321              | 327              | 246              | 298              | 250              | 285              | 357              | 299              | 299              | 296              | 301              | 298              | 297              | 294              | 303              |
| 1PL   | 298              | 375              | 340              | 226              | 298              | 248              | 270              | 343              | 298              | 299              | 291              | 302              | 298              | 297              | 291              | 303              |
| BTL   | 298              | 375              | 350              | 243              | 298              | 257              | 278              | 324              | 298              | 299              | 296              | 299              | 298              | 297              | 295              | 300              |
| PTL   | 298              | 391              | 360              | 247              | 298              | 268              | 277              | 316              | 298              | 298              | 296              | 299              | 298              | 298              | 296              | 299              |
| HXL   | 298              | 377              | 366              | 258              | 298              | 251              | 280              | 316              | 298              | 298              | 296              | 299              | 298              | 298              | 297              | 299              |
| HPL   | 298              | 377              | 379              | 261              | 298              | 250              | 284              | 312              | 298              | 300              | 296              | 298              | 298              | 298              | 297              | 299              |
| OTL   | 298              | 385              | 361              | 269              | 298              | 260              | 277              | 310              | 298              | 298              | 296              | 298              | 298              | 297              | 296              | 299              |

**Table E. Equipartition of  $\Delta H_{\text{vap}}$  estimates.** Systematic differences between  $\Delta H_{\text{vap}}$  estimates from different gas-phase setups are due to violation of equipartition. The data is illustrated graphically in Fig. 4. The test set includes eight linear alcohols — methanol (MTL), ethanol (ETL), propanol (1PL), butanol (BTL), pentanol (PTL), hexanol (HXL), heptanol (HPL), and octanol (OTL). (a) lists  $\Delta H_{\text{vap}}$  estimates for all compounds, computed using three different gas-phase simulation setups. Compared to the SD setup, the WC setup is found to yield consistently lower estimates, while the VR setup yields higher estimates. The deviation between the WC setup and the SD setup is around three standard errors for the compounds with alkyl chains of four or more carbon atoms. The deviation between the VR and SD setup is around one standard error in all cases. (b) lists the total, translational, rotational and internal temperatures averaged over the simulation runs for all three gas-phase setups, as well as for the liquid setup. The total temperature is kept at 298 K in all cases. The liquid simulations show a slightly elevated internal temperature and a slightly reduced rotational temperature. The gas-phase results of the SD setup are virtually indistinguishable from the liquid simulations. The VR results show a significantly increased internal temperature, while the WC results show significantly too cold internal temperatures.

| Estimator      | GAS WC           |                  |                  |                  | GAS VR           |                  |                  |                  |
|----------------|------------------|------------------|------------------|------------------|------------------|------------------|------------------|------------------|
|                | $T_{\text{tot}}$ | $T_{\text{tra}}$ | $T_{\text{rot}}$ | $T_{\text{int}}$ | $T_{\text{tot}}$ | $T_{\text{tra}}$ | $T_{\text{rot}}$ | $T_{\text{int}}$ |
| $T_{p^2}$      | 298.03           | 374.65           | 339.80           | 225.91           | 297.93           | 248.37           | 269.52           | 343.02           |
| $T_{pv}^{(2)}$ | 296.80           | 374.66           | 340.09           | 223.82           | 296.42           | 248.93           | 269.31           | 339.19           |
| $T_{pv}^{(4)}$ | 297.54           | 374.66           | 340.11           | 225.43           | 297.48           | 247.93           | 270.18           | 341.71           |
| $T_{pv}^{(6)}$ | 297.70           | 374.66           | 340.16           | 225.48           | 297.72           | 247.95           | 270.11           | 341.60           |

**Table F. Equipartition using different temperature estimates.** The difference between equipartition estimates using different temperature estimates is negligible compared to the deviations due to the choice of thermostat. This table lists the equipartition for propanol (1PL) estimated by different temperature estimates: Calculated from the integrated momenta only ( $T_{p^2}$ ), or from the product of the integrated momenta and an estimate of the time derivative of second order ( $T_{pv}^{(2)}$ ), fourth order ( $T_{pv}^{(4)}$ ), or sixth order ( $T_{pv}^{(6)}$ ), as defined by Eastwood *et al.* [1]. The more robust temperature estimates  $T_{pv}^{(2)}$ ,  $T_{pv}^{(4)}$ , and  $T_{pv}^{(6)}$  do display only slightly different temperatures compared to the standard estimate  $T_{p^2}$ . Most notably, the differences between the more robust estimates and the standard estimates are much smaller than the deviations from the expected equipartition behavior.

| Scheme          | $T_{p,\text{tot}}(\mu)$ [K] | $T_{p,\text{tot}}(\sigma)$ [K] | $T_{p,\text{int}}(\mu)$ [K] | $T_{p,\text{int}}(\sigma)$ [K] |
|-----------------|-----------------------------|--------------------------------|-----------------------------|--------------------------------|
| VR <sub>1</sub> | 299.53 ± 0.23               | 301.46 ± 3.30                  | 299.57 ± 0.23               | 301.62 ± 3.18                  |
| VR <sub>2</sub> | 299.76 ± 0.26               | 298.85 ± 3.13                  | 299.81 ± 0.27               | 298.83 ± 3.00                  |
| VR <sub>s</sub> | 298.81 ± 0.24               | 295.77 ± 2.70                  | 298.82 ± 0.25               | 295.78 ± 2.91                  |
| WC <sub>1</sub> | 298.85 ± 0.25               | 298.83 ± 2.98                  | 298.88 ± 0.25               | 298.74 ± 2.95                  |
| WC <sub>2</sub> | 299.93 ± 0.18               | 236.79 ± 2.43                  | 299.95 ± 0.19               | 236.85 ± 2.45                  |
| WC <sub>s</sub> | 298.69 ± 0.24               | 294.59 ± 2.90                  | 298.74 ± 0.24               | 294.00 ± 3.31                  |
| NH <sub>1</sub> | 299.12 ± 0.23               | 299.54 ± 2.91                  | 299.20 ± 0.24               | 299.74 ± 3.27                  |
| NH <sub>2</sub> | 299.52 ± 0.26               | 321.26 ± 3.57                  | 299.56 ± 0.27               | 321.41 ± 3.43                  |
| NH <sub>s</sub> | 299.19 ± 0.24               | 303.60 ± 2.93                  | 299.23 ± 0.26               | 304.19 ± 2.67                  |

**Table G. Validation of temperature coupling schemes for trp-cage.** The width of the kinetic energy distributions sampled by the different schemes differ significantly when the solute is coupled to a separate thermostat. The data is illustrated graphically in Fig. 5. This table lists the temperature equivalent (see Eq. 12) of the mean and the variance of the total and the internal temperature of the trp-cage peptide for nine different thermostat coupling schemes.

## References

1. Eastwood MP, Stafford KA, Lippert RA, Jensen MØ, Maragakis P, Predescu C, Dror RO, Shaw, DE. Equipartition and the Calculation of Temperature in Biomolecular Simulations. *Journal of Chemical Theory and Computation*. 2010;7:2045–2058. doi:10.1021/ct9002916.
